# Supplementary material for: Evaluation of regional climate features over Antarctica in the PMIP past1000 experiment and implications for 21st-century sea level rise
Source: Copernicus journal article supplement (doi:10.5194/egusphere-2024-3638), 2024-12-02
Supplement: Supplementary file 1 [file egusphere-2024-3638-supplement.pdf]

# Supplement of 'Evaluation of regional climate features over Antarctica in the PMIP past1000 experiment and implications for 21st-century sea level rise'

Vincent Charnay <sup>1</sup>, Daniel P. Lowry <sup>1,2</sup>, Elizabeth D. Keller <sup>1,2</sup>, and Abha Sood <sup>3</sup>

<sup>1</sup>Antarctic Research Centre, Victoria University of Wellington, Wellington, New Zealand

<sup>2</sup>Department of Surface Geosciences, GNS Science, Lower Hutt, New Zealand

<sup>3</sup>Centre of Sustainability, University of Otago, Dunedin, New Zealand

**Correspondence:** Vincent Charnay (vincent.charnay@vuw.ac.nz)

## S1 Data tables

**Table S1.** Ice core sites used for snow accumulation reconstructions.

| Site name              | Latitude (°) | Longitude (°) | Elevation (m) | Years     | Citations             |
|------------------------|--------------|---------------|---------------|-----------|-----------------------|
| Vostok composite VRS13 | -78.47       | 106.83        | 3488          | 1654-2010 | Ekaykin et al. (2014) |
| B31Site DML07          | -75.58       | -3.43         | 2680          | 1000-1994 | Oerter et al. (2000)  |
| B32Site DML05          | -75          | -0.01         | 2892          | 1248-1996 | Oerter et al. (2000)  |
| B33Site DML17          | -75.17       | 6.5           | 3160          | 1250-1997 | Oerter et al. (2000)  |
| FB9804                 | -75.25       | -6            | 2630          | 1801-1996 | Oerter et al. (2000)  |
| FB9805                 | -75.17       | -0.99         | 2840          | 1800-1997 | Oerter et al. (2000)  |
| FB9807                 | -74.99       | 0.03          | 2880          | 1758-1997 | Oerter et al. (2000)  |
| FB9808                 | -74.75       | 0.99          | 2860          | 1801-1997 | Oerter et al. (2000)  |
| FB9809                 | -74.49       | 1.96          | 2843          | 1801-1997 | Oerter et al. (2000)  |
| FB9810                 | -74.66       | 4             | 2980          | 1801-1997 | Oerter et al. (2000)  |
| FB9811                 | -75.08       | 6.5           | 3160          | 1801-1997 | Oerter et al. (2000)  |
| FB9812                 | -75.25       | 6.50          | 3160          | 1810-1997 | Oerter et al. (2000)  |
| FB9813                 | -75.16       | 5             | 3100          | 1800-1997 | Oerter et al. (2000)  |
| FB9814                 | -75.08       | 2.5           | 2970          | 1801-1997 | Oerter et al. (2000)  |
| FB9815                 | -74.95       | -1.5          | 2840          | 1801-1997 | Oerter et al. (2000)  |
| FB9816                 | -75          | -4.5          | 2740          | 1800-1997 | Oerter et al. (2000)  |
| FB9817                 | -75          | -6.49         | 2680          | 1800-1997 | Oerter et al. (2000)  |

|                            |        |         |      |           |                               |
|----------------------------|--------|---------|------|-----------|-------------------------------|
| South Pole 1995            | -90    | 0       | 2850 | 1801-1991 | Mosley-Thompson et al. (1999) |
| GV2                        | -71.71 | 145.26  | 2143 | 1670-2003 | Frezzotti et al. (2013)       |
| LGB65                      | -71.85 | 77.92   | 1850 | 1745-1996 | Xiao et al. (2004)            |
| US-ITASE-2002-4            | -86.5  | -107.99 | 2586 | 1594-2003 | Mayewski and Dixon (2013)     |
| DSS Law Dome               | -66.77 | 112.80  | 1370 | -22-1995  | Roberts et al. (2015)         |
| 200th km                   | -68.25 | 94.08   | 1990 | 1640-1988 | Ekaykin et al. (2016)         |
| Berkner Island (South)     | -79.57 | -45.72  | 890  | 1000-1992 | Mulvaney et al. (2002)        |
| James Ross Island          | -64.22 | -57.68  | 1640 | 1832-1997 | Aristarain et al. (2004)      |
| Ferrigno                   | -74.57 | -86.9   | 1354 | 1703-2010 | Thomas and Bracegirdle (2015) |
| Bryan Coast                | -74.49 | -81.67  | 1177 | 1712-2010 | Thomas and Bracegirdle (2015) |
| DIV2010                    | -76.77 | -101.74 | 1330 | 1786-2010 | Medley et al. (2013)          |
| WDC05A                     | -79.46 | -112.09 | 1806 | 1775-2005 | Banta et al. (2008)           |
| WD05Q                      | -79.46 | -112.09 | 1759 | 1522-2005 | Banta et al. (2008)           |
| WAIS 2014                  | -79.46 | -112.09 | 1759 | 0-2006    | Fudge et al. (2016)           |
| Ross ice drainage system A | -78.73 | -116.33 | 1740 | 1831-1995 | Kaspari et al. (2004)         |
| US-ITASE-1999-1            | -80.62 | -122.63 | 1350 | 1724-2000 | Kaspari et al. (2004)         |
| US-ITASE-2000-1            | -79.38 | -111.24 | 1791 | 1673-2001 | Kaspari et al. (2004)         |
| US-ITASE-2000-4            | -78.08 | -120.07 | 1697 | 1798-2000 | Kaspari et al. (2004)         |
| US-ITASE-2000-5            | -77.68 | -123.99 | 1828 | 1718-1999 | Kaspari et al. (2004)         |
| US-ITASE-2001-5            | -77.05 | -89.13  | 1239 | 1780-2002 | Kaspari et al. (2004)         |
| Hercules Névé              | -73.1  | 165.4   | 2960 | 1770-1992 | Stenni et al. (1999)          |
| TD96 Talos Dome            | -72.8  | 159.06  | 2316 | 1232-1995 | Graf et al. (2002)            |
| GV5                        | -71.89 | 158.54  | 2184 | 1777-2004 | Frezzotti et al. (2007)       |
| RICE                       | -79.36 | 161.64  | 560  | 0-2012    | Bertler et al. (2018)         |
| Fimbulisen S100            | -70.24 | 4.8     | 48   | 1737-1999 | Kaczmarska et al. (2004)      |
| H72                        | -69.2  | 41.08   | 1214 | 1832-1999 | Nishio et al. (2002)          |
| Derwael Ice Rise IC12      | -70.25 | 26.34   | 450  | 1744-2011 | Philippe et al. (2016)        |

**Table S2.** Marine sediments sites used for Southern Ocean SST reconstructions, Site 1 (i.e. Southern1159aSepulveda2009\_Cf7-PC33), Site 2 (i.e. Southern0483aShevenell2011\_ODP-1098B), Site 3 (i.e. Southern0485aMohtadi2007\_GeoB7186-3) and Site 4 (i.e. Southern0045aLamy2002\_GeoB3313-1).

| Site name | Latitude (°) | Longitude (°) | Season | Years    | Proxy type | Citations               |
|-----------|--------------|---------------|--------|----------|------------|-------------------------|
| Site 1    | -44.33       | -72.97        | SON    | 867-1784 | Alkenones  | Sepúlveda et al. (2009) |
| Site 2    | -64.87       | -64.20        | SON    | 885-1816 | TEX86      | Shevenell et al. (2011) |
| Site 3    | -44.15       | -75.16        | Annual | 863-1851 | Alkenones  | Mohtadi et al. (2007)   |
| Site 4    | -41          | -74.45        | Annual | 870-1650 | Alkenones  | Lamy et al. (2002)      |

## S2 SAT time series - CESM-LME

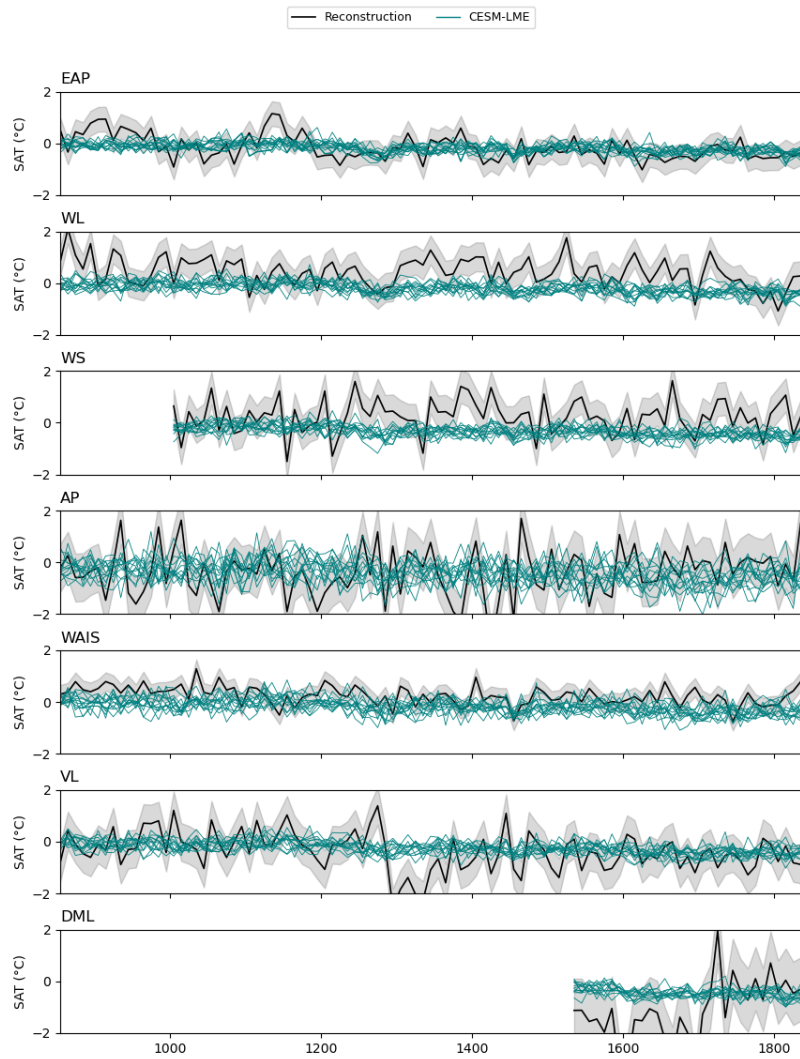

**Figure S1.** Same as Figure 4 but for the 13 ensemble members CESM-LME.

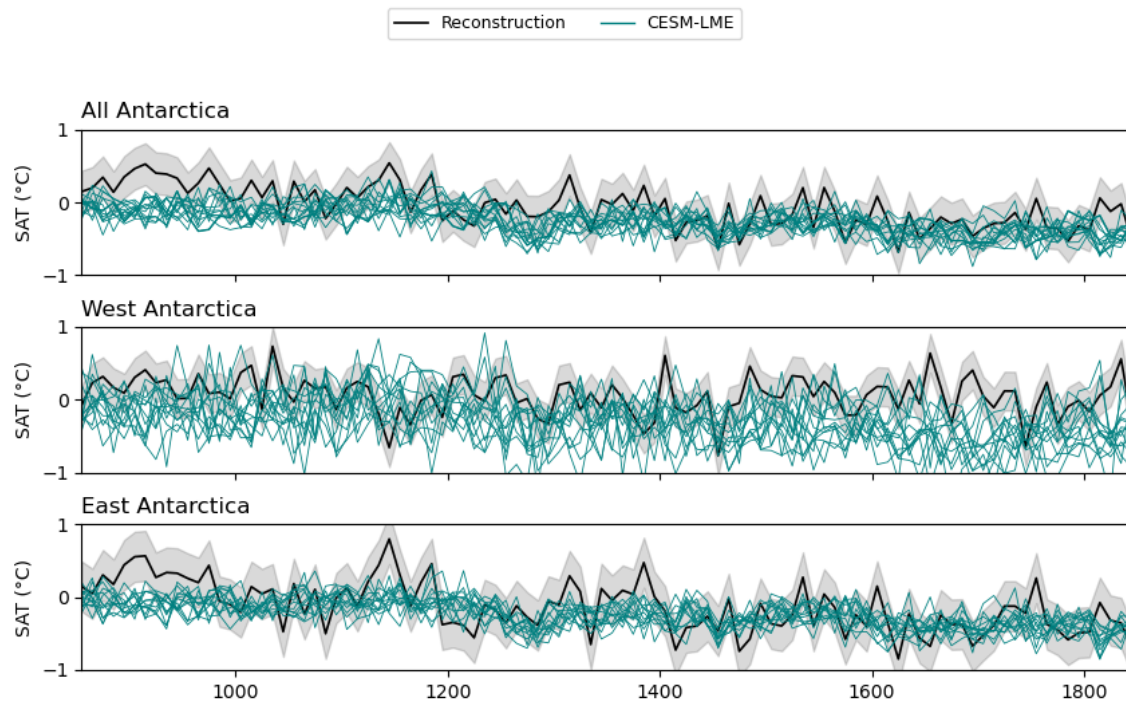

**Figure S2.** Same as Figure 6 but for the 13 ensemble members CESM-LME.

### S3 SST time series - CESM-LME

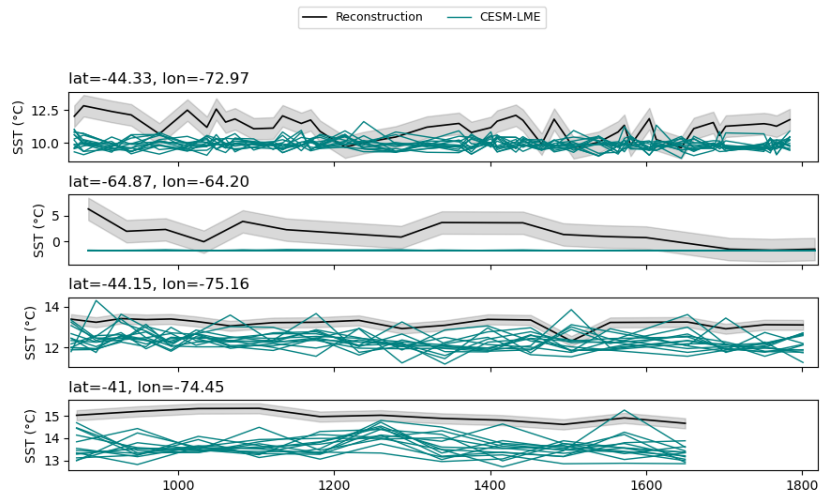

**Figure S3.** Same as Figure 8 but for the 13 ensemble members CESM-LME.

### S4 Reconstructed Niño 3.4 index

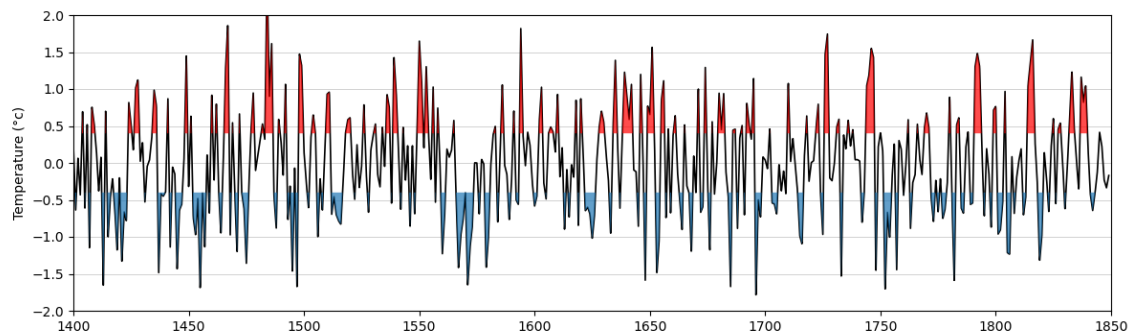

**Figure S4.** Reconstructed Niño 3.4 index over 1400-1850 CE (Cook et al., 2008).

## 5 References

- Aristarain, A. J., Delmas, R. J., and Stievenard, M.: Ice-core study of the link between sea-salt aerosol, sea-ice cover and climate in the Antarctic Peninsula area, *Climatic Change*, 67, 63–86, 2004.
- Banta, J. R., McConnell, J. R., Frey, M. M., Bales, R. C., and Taylor, K.: Spatial and temporal variability in snow accumulation at the West Antarctic Ice Sheet Divide over recent centuries, *Journal of Geophysical Research: Atmospheres*, 113, 2008.
- 10 Bertler, N. A., Conway, H., Dahl-Jensen, D., Emanuelsson, D. B., Winstrup, M., Vallelonga, P. T., Lee, J. E., Brook, E. J., Severinghaus, J. P., Fudge, T. J., et al.: The Ross Sea Dipole–temperature, snow accumulation and sea ice variability in the Ross Sea region, Antarctica, over the past 2700 years, *Climate of the Past*, 14, 193–214, 2018.
- Cook, E., D’Arrigo, R., and Anchukaitis, K.: ENSO reconstructions from long tree-ring chronologies: Unifying the differences, in: Talk presented at a special workshop on Reconciling ENSO Chronologies for the Past, vol. 500, p. 15, 2008.
- 15 Ekaykin, A., Kozachek, A., Lipenkov, V., and Shibaev, Y.: Multiple climate shifts in the Southern Hemisphere over the past three centuries based on central Antarctic snow pits and core studies, *Annals of Glaciology*, 55, <https://doi.org/10.3189/2014AoG66A189>, 2014.
- Ekaykin, A., Eberlein, L., Lipenkov, V., Popov, S., Scheinert, M., Schröder, L., and Turkeev, A.: Non-climatic signal in ice core records: lessons from Antarctic megadunes, *The Cryosphere*, 10, 1217–1227, 2016.
- Frezzotti, M., Urbini, S., Proposito, M., Scarchilli, C., and Gandolfi, S.: Spatial and temporal variability of surface mass balance near Talos Dome, East Antarctica, *Journal of Geophysical Research: Earth Surface*, 112, 2007.
- 20 Frezzotti, M., Scarchilli, C., Becagli, S., Proposito, M., and Urbini, S.: A synthesis of the Antarctic surface mass balance during the last 800 yr, *The Cryosphere*, 7, 303–319, 2013.
- Fudge, T., Markle, B. R., Cuffey, K. M., Buizert, C., Taylor, K. C., Steig, E. J., Waddington, E. D., Conway, H., and Koutnik, M.: Variable relationship between accumulation and temperature in West Antarctica for the past 31,000 years, *Geophysical Research Letters*, 43, 3795–3803, 2016.
- 25 Graf, W., Oerter, H., Reinwarth, O., Stichler, W., Wilhelms, F., Miller, H., and Mulvaney, R.: Stable-isotope records from Dronning Maud Land, Antarctica, *Annals of Glaciology*, 35, 195–201, 2002.
- Kaczmarek, M., Isaksson, E., Karlöf, L., Winther, J.-G., Kohler, J., Godtlielsen, F., Olsen, L. R., Hofstede, C. M., Van Den Broeke, M. R., Van De Wal, R. S., et al.: Accumulation variability derived from an ice core from coastal Dronning Maud Land, Antarctica, *Annals of Glaciology*, 39, 339–345, 2004.
- 30 Kaspari, S., Mayewski, P. A., Dixon, D. A., Spikes, V. B., Sneed, S. B., Handley, M. J., and Hamilton, G. S.: Climate variability in West Antarctica derived from annual accumulation-rate records from ITASE firn/ice cores, *Annals of Glaciology*, 39, 585–594, 2004.
- Lamy, F., Rühlemann, C., Hebbeln, D., and Wefer, G.: Temperature and salinity reconstruction for sediment core GeoB3313-1, <https://doi.org/10.1594/PANGAEA.735166>, 2002.
- 35 Mayewski, P. A. and Dixon, D. A.: U.S. International Trans Antarctic Scientific Expedition (US ITASE) glaciochemical data, version 2, National Snow and Ice Data Center, accessed: 5 January 2015, 2013.
- Medley, B., Joughin, I., Das, S. B., Steig, E. J., Conway, H., Gogineni, S., Criscitiello, A. S., McConnell, J. R., Smith, B., van den Broeke, M. R., et al.: Airborne-radar and ice-core observations of annual snow accumulation over Thwaites Glacier, West Antarctica confirm the spatiotemporal variability of global and regional atmospheric models, *Geophysical Research Letters*, 40, 3649–3654, 2013.

- 40 Mohtadi, M., Max, L., Hebbeln, D., Baumgart, A., Krück, N., and Jennerjahn, T.: Modern environmental conditions recorded in surface sediment samples off W and SW Indonesia: Planktonic foraminifera and biogenic compounds analyses, *Marine Micropaleontology*, 65, 96–112, 2007.
- Mosley-Thompson, E., Paskievitch, J. F., Gow, A. J., and Thompson, L. G.: Late 20th century increase in South Pole snow accumulation, *Journal of Geophysical Research: Atmospheres*, 104, 3877–3886, 1999.
- 45 Mulvaney, R., Oerter, H., Peel, D. A., Graf, W., Arrowsmith, C., Pasteur, E. C., Knight, B., Littot, G. C., and Miners, W. D.: 1000 year ice-core records from Berkner Island, Antarctica, *Annals of Glaciology*, 35, 45–51, 2002.
- Nishio, F., Furukawa, T., Hashida, G., Igarashi, M., Kameda, T., Kohno, M., Motoyama, H., Naoki, K., Satow, K., Suzuki, K., et al.: Annual-layer determinations and 167 year records of past climate of H72 ice core in east Dronning Maud Land, Antarctica, *Annals of Glaciology*, 35, 471–479, 2002.
- 50 Oerter, H., Wilhelms, F., Jung-Rothenhäusler, F., Göktas, F., Miller, H., Graf, W., and Sommer, S.: Accumulation rates in Dronning Maud Land, Antarctica, as revealed by dielectric-profiling measurements of shallow firn cores, *Annals of Glaciology*, 30, 27–34, 2000.
- Philippe, M., Tison, J.-L., Fjøsne, K., Hubbard, B., Kjær, H. A., Lenaerts, J. T., Sheldon, S. G., De Bondt, K., Claeys, P., and Pattyn, F.: Ice core evidence for a recent increase in snow accumulation in coastal Dronning Maud Land, East Antarctica, *Cryosphere Discussions*, 10, 2501–2516, 2016.
- 55 Roberts, J., Plummer, C., Vance, T., van Ommen, T., Moy, A., Poynter, S., Treverrow, A., Curran, M., and George, S.: A 2000-year annual record of snow accumulation rates for Law Dome, East Antarctica, *Climate of the Past*, 11, 697–707, 2015.
- Sepúlveda, J., Wendler, J., Leider, A., Kuss, H.-J., Summons, R. E., and Hinrichs, K.-U.: Molecular isotopic evidence of environmental and ecological changes across the Cenomanian–Turonian boundary in the Levant Platform of central Jordan, *Organic Geochemistry*, 40, 553–568, 2009.
- 60 Shevenell, A. E., Ingalls, A., Domack, E., and Kelly, C.: Holocene Southern Ocean surface temperature variability west of the Antarctic Peninsula, *Nature*, 470, 250–254, 2011.
- Stenni, B., Caprioli, R., Cimino, L., Cremisini, C., Flora, O., Gagnani, R., Longinelli, A., Maggi, V., and Torcini, S.: 200 years of isotope and chemical records in a firn core from Hercules Neve, northern Victoria Land, Antarctica, *Annals of Glaciology*, 29, 106–112, 1999.
- Thomas, E. R. and Bracegirdle, T. J.: Precipitation pathways for five new ice core sites in Ellsworth Land, West Antarctica, *Climate dynamics*, 44, 2067–2078, 2015.
- 65 Xiao, C., Allison, I., Ren, J., Qin, D., Zhang, M., and Li, Z.: Meteorological and glaciological evidence for different climatic variations on the east and west sides of the Lambert Glacier basin, Antarctica, *Annals of Glaciology*, 39, 188, 2004.
